# Supplementary material for: Low-coordinate Sm(ii) and Yb(ii) complexes derived from sterically-hindered 1,2-bis(imino)acenaphthene (ArBIG-bian)
Source: Royal Society of Chemistry journal article supplement (doi:10.1039/d0dt02963g), 2020-01-01
Supplement: d0dt02963g1.pdf [file d0dt02963g1.pdf]

## Supporting Information

for

### Low-Coordinate Sm(II) and Yb(II) Complexes Derived from Sterically-Hindered 1,2-Bis(imino)acenaphthene (Ar<sup>BIG</sup>-bian)

Daria A. Lukina,<sup>a</sup> Alexandra A. Skatova,<sup>a</sup> Vladimir G. Sokolov,<sup>a</sup> Evgenii V. Baranov,<sup>a</sup> Serhiy Demeshko,<sup>b</sup> Sergey Yu. Ketkov<sup>a</sup> and Igor L. Fedushkin\*<sup>a</sup>

<sup>a</sup> *G. A. Razuvaev Institute of Organometallic Chemistry of the Russian Academy of Sciences, Tropinina Str. 49, Nizhny Novgorod 603137, Russian Federation*

<sup>b</sup> *Institut für Anorganische Chemie, Georg-August-Universität Tammannstrasse 4, Göttingen 37077, Germany*

**X-ray crystallography.** The X-ray data for **2a**, **2b** and **3** were collected at 100(2) K on a Bruker AXS D8 Quest diffractometer (MoK $\alpha$ -radiation,  $\omega$ - and  $\varphi$ -scan technique,  $\lambda = 0.71073$  Å). The structures were solved by direct methods using “dual-space” algorithm with SHELXT program [Sheldrick G.M. (2015) *Acta Cryst.*, A71, 3-8] and were refined by full-matrix least squares on  $F^2$  using SHELXTL [Sheldrick G.M. (2003). SHELXTL v. 6.14, Structure Determination Software Suite, Bruker AXS, Madison, Wisconsin, USA]. All hydrogen atoms were placed in calculated positions and were refined in the riding model. SADABS [Sheldrick G.M. (2016). SADABS v.2016/2, Bruker/Siemens Area Detector Absorption Correction Program, Bruker AXS, Madison, Wisconsin, USA] was used to perform area-detector scaling and absorption corrections. Solvent molecules of toluene and DME predominantly located in the common position were found in the crystal of **2a**, **3** and **2b** respectively. The ratios of solvate molecules per Ln complex are 1:1 for **2a**, **3** and 2.5:1 for **2b**. Toluene molecules in **2b** are disordered in both common and special positions. Crystallographic data and structural refinement details are given in Table 1S. CCDC 2022601 (**2a**), 2022602 (**2b**) and 2022603 (**3**) contain the supplementary crystallographic data for this paper. These data can be obtained free of charge from The Cambridge Crystallographic Data Centre via [www.ccdc.cam.ac.uk/data\\_request/cif](http://www.ccdc.cam.ac.uk/data_request/cif).

## DFT calculations.

Full reference for the Gaussian 09 program package:

*Gaussian 09, Revision B.01*, M. J. Frisch, G. W. Trucks, H. B. Schlegel, G. E. Scuseria, M. A. Robb, J. R. Cheeseman, G. Scalmani, V. Barone, B. Mennucci, G. A. Petersson, H. Nakatsuji, M. Caricato, X. Li, H. P. Hratchian, A. F. Izmaylov, J. Bloino, G. Zheng, J. L. Sonnenberg, M. Hada, M. Ehara, K. Toyota, R. Fukuda, J. Hasegawa, M. Ishida, T. Nakajima, Y. Honda, O. Kitao, H. Nakai, T. Vreven, J. A. Montgomery, Jr., J. E. Peralta, F. Ogliaro, M. Bearpark, J. J. Heyd, E. Brothers, K. N. Kudin, V. N. Staroverov, R. Kobayashi, J. Normand, K. Raghavachari, A. Rendell, J. C. Burant, S. S. Iyengar, J. Tomasi, M. Cossi, N. Rega, J. M. Millam, M. Klene, J. E. Knox, J. B. Cross, V. Bakken, C. Adamo, J. Jaramillo, R. Gomperts, R. E. Stratmann, O. Yazyev, A. J. Austin, R. Cammi, C. Pomelli, J. W. Ochterski, R. L. Martin, K. Morokuma, V. G. Zakrzewski, G. A. Voth, P. Salvador, J. J. Dannenberg, S. Dapprich, A. D. Daniels, Ö. Farkas, J. B. Foresman, J. V. Ortiz, J. Cioslowski, and D. J. Fox, Gaussian, Inc., Wallingford CT, 2010.

## Cartesian coordinates of the optimized structure of 2c:

```
Sm 0.57230002 -1.29289997 -0.12400000
N 0.59820002 1.11240005 -0.42260000
N -1.66299999 -0.58010000 0.34130001
C -0.71120000 1.39189994 -0.76050001
C -1.82560003 0.54710001 -0.42510000
C -3.06089997 1.21850002 -0.88980001
C -2.65179992 2.42090011 -1.54610002
C -1.23179996 2.56069994 -1.50430000
C -0.67250001 3.68490005 -2.11439991
H 0.41270000 3.86159992 -2.11360002
C -1.53799999 4.63619995 -2.73990011
H -1.08440006 5.51889992 -3.21760011
C -2.92370009 4.49679995 -2.75070000
H -3.55679989 5.26109982 -3.22849989
C -3.52920008 3.35540009 -2.12899995
C -4.92990017 3.06809998 -2.02329993
H -5.66720009 3.75939989 -2.46099997
C -5.34840012 1.91980004 -1.35599995
H -6.42710018 1.71560001 -1.26610005
C -4.43389988 0.98199999 -0.78160000
H -4.82840014 0.09240000 -0.26989999
C 1.50790000 2.17560005 -0.26650000
C 1.32480001 3.18300009 0.73809999
C 2.27859998 4.20949984 0.87099999
H 2.11840010 4.98089981 1.64250004
C 3.42199993 4.26789999 0.06110000
C 3.60419989 3.28780007 -0.92150003
H 4.48330021 3.33240008 -1.58529997
```

C 2.66210008 2.25889993 -1.10889995  
C 0.15070000 3.15820003 1.69369996  
H -0.69370002 2.58829999 1.25860000  
C 0.42280000 2.61240005 3.09179997  
C 1.71940005 2.36059999 3.58500004  
H 2.58699989 2.54740000 2.93409991  
C 1.91579998 1.87750006 4.89120007  
H 2.93910003 1.69009995 5.25339985  
C 0.81930000 1.63639998 5.73269987  
H 0.97350001 1.25860000 6.75500011  
C -0.47960001 1.88399994 5.25500011  
H -1.35060000 1.69900000 5.90310001  
C -0.67210001 2.36360002 3.95110011  
H -1.69420004 2.55040002 3.58299994  
C 2.84439993 1.29439998 -2.25920010  
H 1.83519995 0.94379997 -2.57030010  
C 3.71190000 0.07350000 -2.00099993  
C 3.97460008 -0.39700001 -0.69660002  
H 3.59130001 0.17739999 0.16300000  
C 4.77629995 -1.53499997 -0.48730001  
H 5.00250006 -1.86129999 0.53979999  
C 5.31850004 -2.23320007 -1.57679999  
H 5.95310020 -3.11730003 -1.41149998  
C 5.06269979 -1.77639997 -2.88179994  
H 5.49510002 -2.30509996 -3.74569988  
C 4.27400017 -0.63470000 -3.08669996  
H 4.09800005 -0.27190000 -4.11289978  
C -2.64980006 -1.54349995 0.54610002  
C -2.83360004 -2.03859997 1.87520003  
C -3.83850002 -2.98130012 2.14019990  
H -3.98490000 -3.32999992 3.17589998  
C -4.64839983 -3.48679996 1.10810006  
C -4.37909985 -3.10459995 -0.21660000  
H -4.94000006 -3.56890011 -1.04509997  
C -3.37490010 -2.16810012 -0.51990002  
C -1.84679997 -1.58190000 2.92680001  
H -1.88039994 -0.48080000 3.05710006  
C -0.41970000 -1.97130001 2.56669998  
C 0.66610003 -1.09560001 2.80699992  
H 0.47690001 -0.10860000 3.25270009

C 1.98689997 -1.46809995 2.47210002  
H 2.81139994 -0.76889998 2.67890000  
C 2.24810004 -2.73659992 1.89999998  
H 3.27729988 -3.03839993 1.65859997  
C 1.17820001 -3.61879992 1.65840006  
H 1.37119997 -4.61490011 1.23230004  
C -0.14530000 -3.23440003 1.97689998  
H -0.98110002 -3.92449999 1.78540003  
C -2.92810011 -1.93400002 -1.94949996  
H -3.12870002 -0.89670002 -2.28620005  
C -1.44710004 -2.22530007 -2.15739989  
C -0.62879997 -1.34500003 -2.90510011  
H -1.06589997 -0.41990000 -3.31040001  
C 0.73760003 -1.63789999 -3.12919998  
H 1.35200000 -0.95620000 -3.73460007  
C 1.31180000 -2.81080008 -2.59850001  
H 2.37579989 -3.03160000 -2.77390003  
C 0.50809997 -3.69499993 -1.84700000  
H 0.94080001 -4.62330008 -1.44430006  
C -0.85850000 -3.40280008 -1.62890005  
H -1.48769999 -4.09889984 -1.05280006  
H -3.51320004 -2.60030007 -2.61989999  
H -5.44630003 -4.21150017 1.32819998  
H -2.10739994 -2.04099989 3.90549994  
H -0.22810000 4.19799995 1.81019998  
H 4.15509987 5.07900000 0.18619999  
H 3.26830006 1.83620000 -3.13100004

**Cartesian coordinates of the optimized structure of decamethylsamarocene Cp\*<sub>2</sub>Sm:**

C 2.39050007 -1.21280003 0.20039999  
C 2.08990002 -0.34650001 1.30680001  
C 2.19580007 1.01010001 0.84670001  
C 2.56329989 0.98110002 -0.54079998  
C 2.68409991 -0.39240000 -0.94050002  
C 2.47160006 -2.71580005 0.25900000  
H 3.47420001 -3.06859994 0.59240001  
H 2.29139996 -3.18790007 -0.72990000  
H 1.73870003 -3.15170002 0.97079998  
C 1.85309994 -0.78270000 2.72799993  
H 2.80809999 -0.90069997 3.28959990

H 1.33280003 -1.76170003 2.78889990  
H 1.24119997 -0.05170000 3.29450011  
C 2.05640006 2.24250007 1.70140004  
H 3.01149988 2.50600004 2.21029997  
H 1.29960001 2.11770010 2.50410008  
H 1.76250005 3.13479996 1.11010003  
C 2.84960008 2.17750001 -1.40999997  
H 3.93300009 2.43589997 -1.42439997  
H 2.31960011 3.08839989 -1.06120002  
H 2.56180000 2.01340008 -2.47110009  
C 3.11700010 -0.87769997 -2.29909992  
H 4.22580004 -0.92830002 -2.39359999  
H 2.77150011 -0.21170001 -3.11929989  
H 2.74239993 -1.89890003 -2.52239990  
C -2.61179996 -0.88889998 -0.61250001  
C -2.24539995 -1.04630005 0.76660001  
C -2.06850004 0.26220000 1.33169997  
C -2.32470012 1.22780001 0.29830000  
C -2.66280007 0.51630002 -0.90170002  
C -2.96199989 -1.99899995 -1.56850004  
H -4.04670000 -2.25060010 -1.53989995  
H -2.42249990 -2.94250011 -1.33920002  
H -2.73659992 -1.73730004 -2.62450004  
C -2.15939999 -2.34990001 1.51650000  
H -3.13400006 -2.63170004 1.97630000  
H -1.42219996 -2.30990005 2.34540009  
H -1.87070000 -3.19790006 0.86030000  
C -1.81900001 0.57819998 2.78200006  
H -2.77010012 0.74830002 3.33690000  
H -1.21190000 1.49820006 2.91589999  
H -1.28960001 -0.24270000 3.30649996  
C -2.33660007 2.72300005 0.48269999  
H -3.30349994 3.08430004 0.90149999  
H -2.19079995 3.26640010 -0.47409999  
H -1.54750001 3.07100010 1.18309999  
C -3.07890010 1.12930000 -2.21300006  
H -4.18529987 1.22689998 -2.29780006  
H -2.75850010 0.52389997 -3.08839989  
H -2.66790009 2.15140009 -2.35139990  
Sm 0.00050000 -0.02920000 -0.46050000

**Table 1S.** Crystal Data and Structure Refinement Details for Compounds **2a**, **2b** and **3**.

|                                                                             | <b>2a</b>                                                         | <b>2b</b>                                                         | <b>3</b>                                                            |
|-----------------------------------------------------------------------------|-------------------------------------------------------------------|-------------------------------------------------------------------|---------------------------------------------------------------------|
| Formula                                                                     | C <sub>85</sub> H <sub>68</sub> N <sub>2</sub> Sm                 | C <sub>82</sub> H <sub>70</sub> N <sub>2</sub> O <sub>2</sub> Sm  | C <sub>99.50</sub> H <sub>90</sub> N <sub>2</sub> O <sub>2</sub> Yb |
| Formula weight                                                              | 1267.76                                                           | 1265.75                                                           | 1518.77                                                             |
| Temperature/K                                                               | 100(2)                                                            | 100(2)                                                            | 100(2)                                                              |
| Crystal system                                                              | monoclinic                                                        | monoclinic                                                        | triclinic                                                           |
| Space group                                                                 | <i>P2</i> <sub>1</sub>                                            | <i>P2</i> <sub>1</sub> / <i>c</i>                                 | <i>P</i> -1                                                         |
| <i>a</i> /Å                                                                 | 13.0258(7)                                                        | 13.7407(11)                                                       | 12.9233(4)                                                          |
| <i>b</i> /Å                                                                 | 18.9888(11)                                                       | 18.7955(17)                                                       | 14.4027(5)                                                          |
| <i>c</i> /Å                                                                 | 13.8042(8)                                                        | 24.607(2)                                                         | 22.7605(7)                                                          |
| <i>α</i> /deg                                                               | 90                                                                | 90                                                                | 87.887(1)                                                           |
| <i>β</i> /deg                                                               | 113.2396(17)                                                      | 104.497(3)                                                        | 74.114(1)                                                           |
| <i>γ</i> /deg                                                               | 90                                                                | 90                                                                | 67.067(1)                                                           |
| <i>V</i> /Å <sup>3</sup>                                                    | 3137.4(3)                                                         | 6152.8(9)                                                         | 3740.9(2)                                                           |
| <i>Z</i>                                                                    | 2                                                                 | 4                                                                 | 2                                                                   |
| density/g/cm <sup>3</sup>                                                   | 1.342                                                             | 1.366                                                             | 1.348                                                               |
| <i>μ</i> /mm <sup>-1</sup>                                                  | 0.985                                                             | 1.007                                                             | 1.305                                                               |
| <i>F</i> (000)                                                              | 1308                                                              | 2616                                                              | 1574                                                                |
| Crystal size /mm                                                            | 0.41 × 0.10 × 0.06                                                | 0.34 × 0.14 × 0.06                                                | 0.35 × 0.29 × 0.27                                                  |
| <i>θ</i> -range/deg                                                         | 2.15 – 25.03                                                      | 2.21 – 27.49                                                      | 2.32 – 28.00                                                        |
| Index ranges                                                                | -15 ≤ <i>h</i> ≤ 15<br>-22 ≤ <i>k</i> ≤ 22<br>-16 ≤ <i>l</i> ≤ 16 | -17 ≤ <i>h</i> ≤ 17<br>-24 ≤ <i>k</i> ≤ 24<br>-31 ≤ <i>l</i> ≤ 31 | -17 ≤ <i>h</i> ≤ 17<br>-19 ≤ <i>k</i> ≤ 19<br>-30 ≤ <i>l</i> ≤ 30   |
| Reflections collected                                                       | 32264                                                             | 75305                                                             | 39323                                                               |
| Independent reflections                                                     | 10867 [ <i>R</i> <sub>int</sub> = 0.0795]                         | 14093 [ <i>R</i> <sub>int</sub> = 0.1032]                         | 17959 [ <i>R</i> <sub>int</sub> = 0.0214]                           |
| Goodness-of-fit on <i>F</i> <sup>2</sup>                                    | 1.022                                                             | 1.030                                                             | 1.047                                                               |
| <i>R</i> <sub>1</sub> / <i>wR</i> <sub>2</sub> ( <i>I</i> > 2σ( <i>I</i> )) | 0.0527 / 0.0885                                                   | 0.0544 / 0.0858                                                   | 0.0255 / 0.0595                                                     |
| <i>R</i> <sub>1</sub> / <i>wR</i> <sub>2</sub> (all parameters)             | 0.0752 / 0.0984                                                   | 0.0938 / 0.0952                                                   | 0.0301 / 0.0608                                                     |
| Largest diff peak/hole [e Å <sup>-3</sup> ]                                 | 1.916 / -1.070                                                    | 1.818 / -1.469                                                    | 0.868 / -0.705                                                      |

**Table 2S.** Averaged calculated electron densities  $\rho(\mathbf{r})$ , potential and kinetic energy densities  $V(\mathbf{r})$  and  $G(\mathbf{r})$ , and their ratio  $|V(\mathbf{r})|/G(\mathbf{r})$  at the Sm-C bonding critical points of complex **2c** and (Cp\*)<sub>2</sub>Sm

| Complex             | $\rho(\text{BCP})$  | $V(\mathbf{r})$      | $G(\mathbf{r})$     | $ V(\mathbf{r}) /G(\mathbf{r})$ |
|---------------------|---------------------|----------------------|---------------------|---------------------------------|
| <b>2c</b>           | 0.0200 <sup>a</sup> | -0.0149 <sup>a</sup> | 0.0158 <sup>a</sup> | 0.94 <sup>a</sup>               |
|                     | 0.0187 <sup>b</sup> | -0.0136 <sup>b</sup> | 0.0146 <sup>b</sup> | 0.94 <sup>b</sup>               |
| Cp* <sub>2</sub> Sm | 0.0325              | -0.0279              | 0.0268              | 1.04                            |

<sup>a</sup> – Ring A; <sup>b</sup> – ring B.

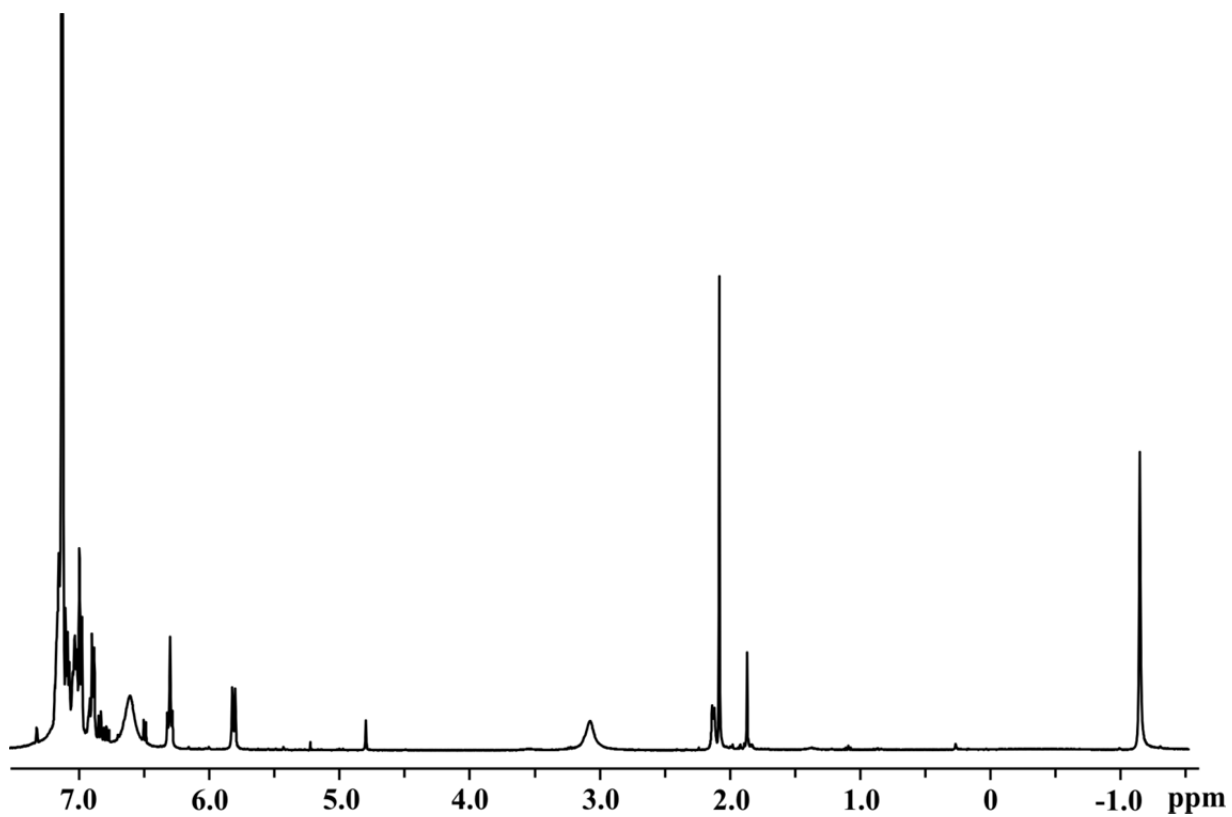

Figure 1S. <sup>1</sup>H NMR spectrum of compound **2a** (400 MHz, 295 K, C<sub>6</sub>D<sub>6</sub>).

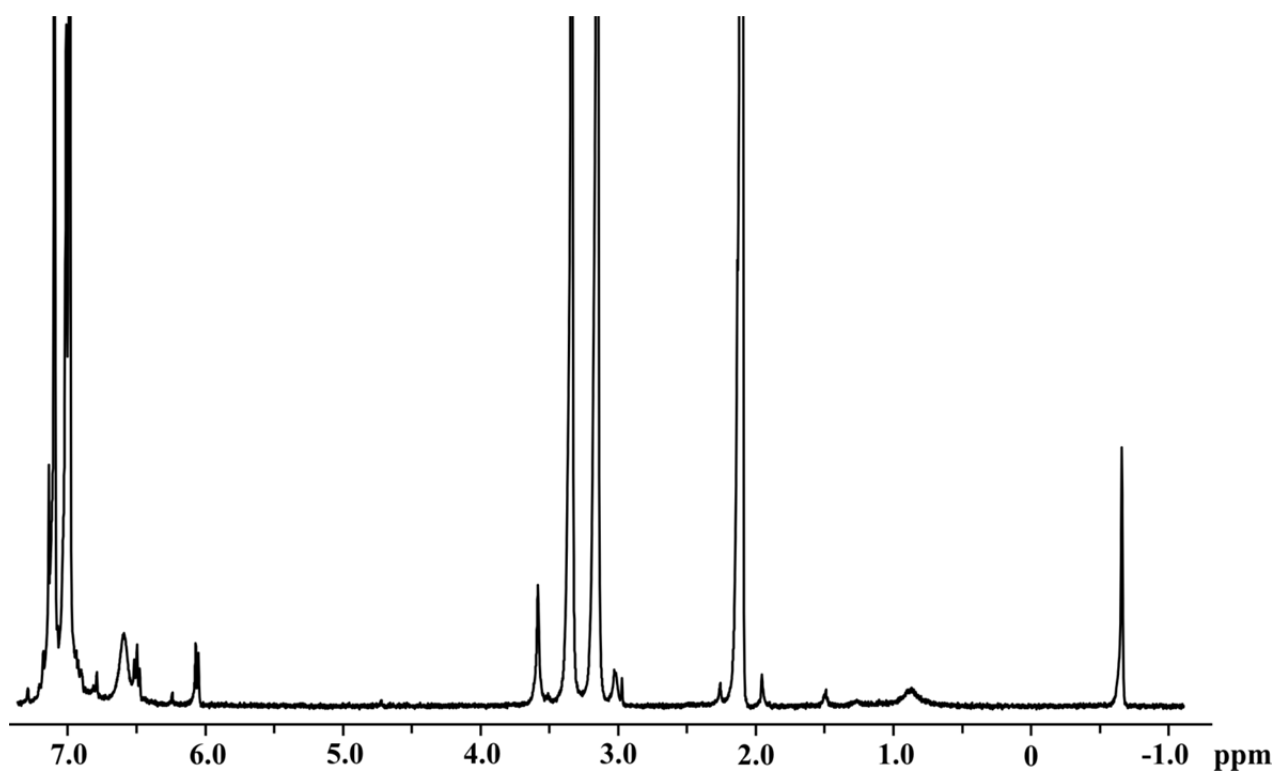

Figure 2S. <sup>1</sup>H NMR spectrum of compound **2b** (400 MHz, 333 K, toluene-d<sub>8</sub>).

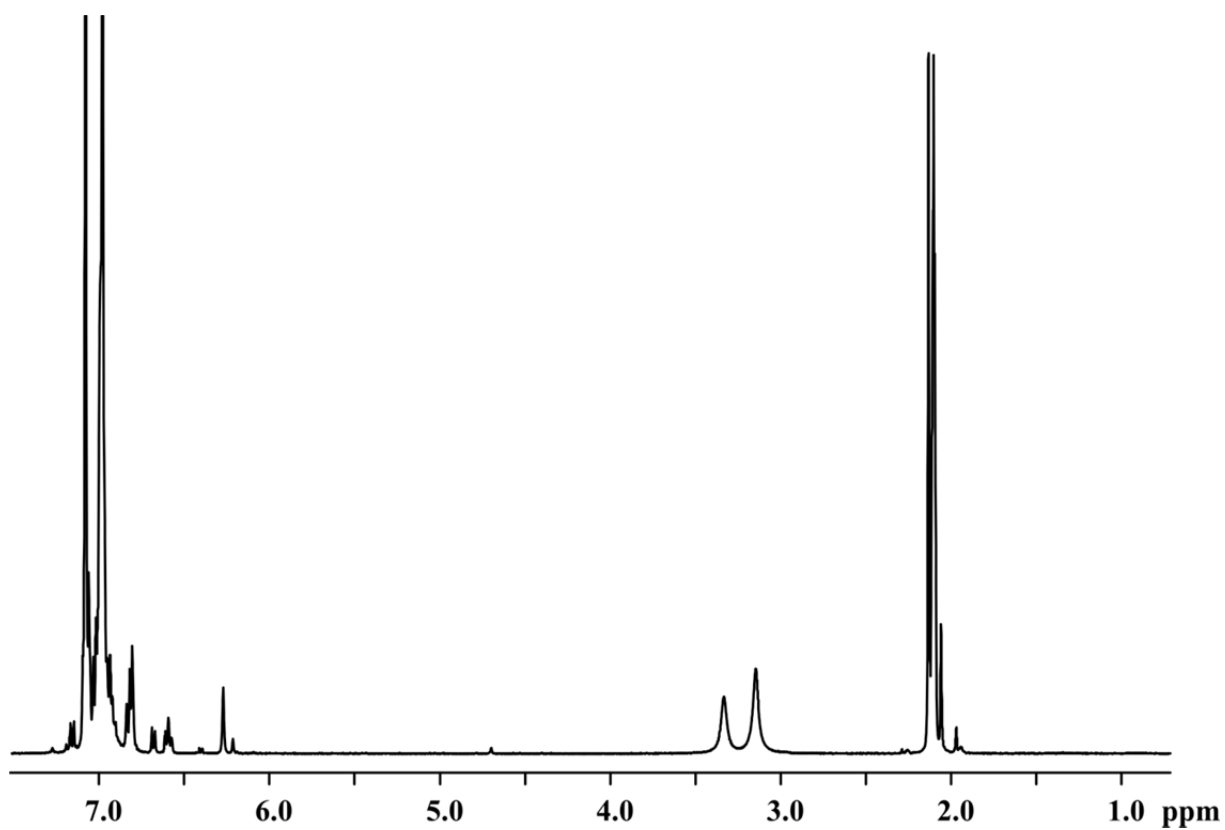

**Figure 3S.**  $^1\text{H}$  NMR spectra of compound **3** (400 MHz, 363 K,  $\text{toluene-d}_8$ ).

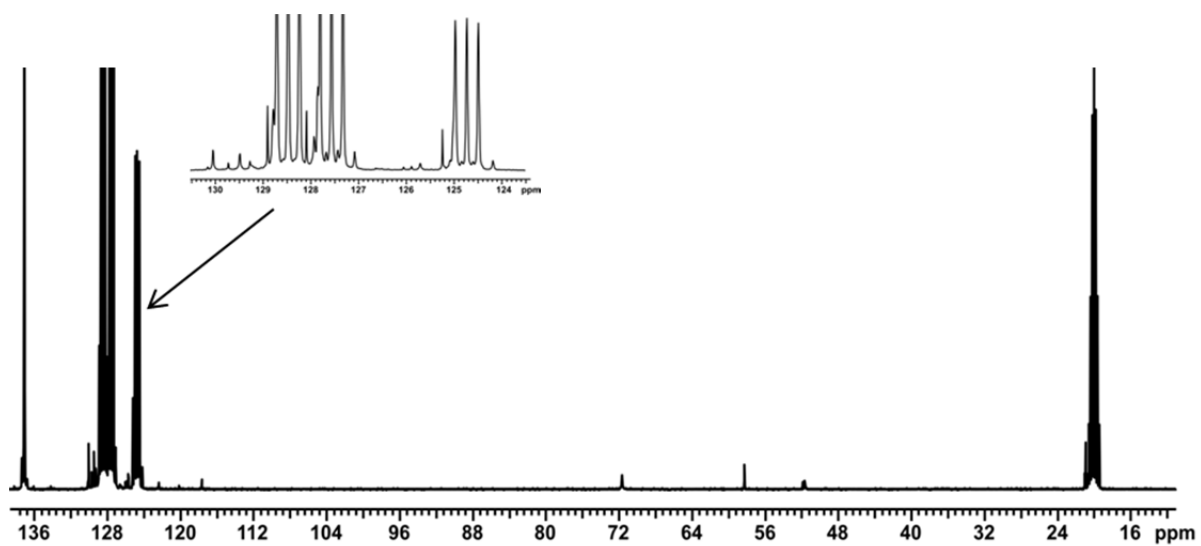

**Figure 4S.**  $^{13}\text{C}$  NMR spectra of compound **3** (100.6 MHz, 297 K,  $\text{toluene-d}_8$ ).



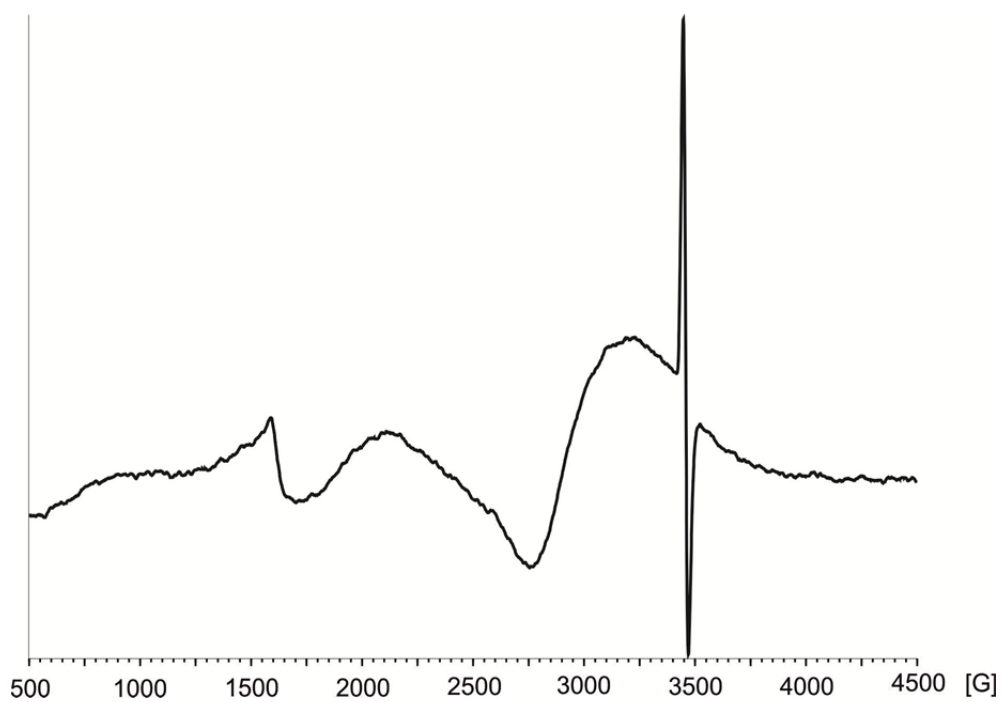

**Figure 5S.** ESR spectrum of polycrystalline sample of compound **3** at 120 K.

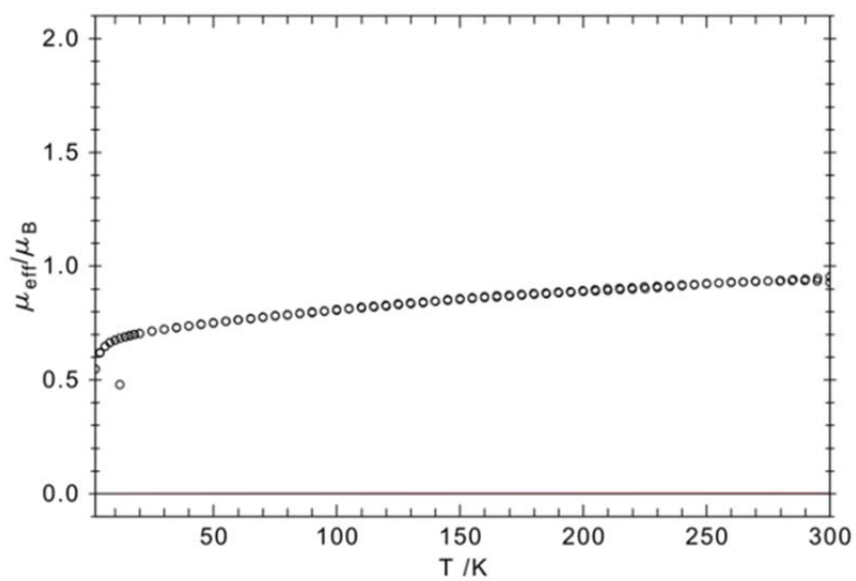

**Figure 6S.** Plot of  $\mu_{\text{eff}}$  vs.  $T$  for a crystalline sample of **3** (300–2 K).

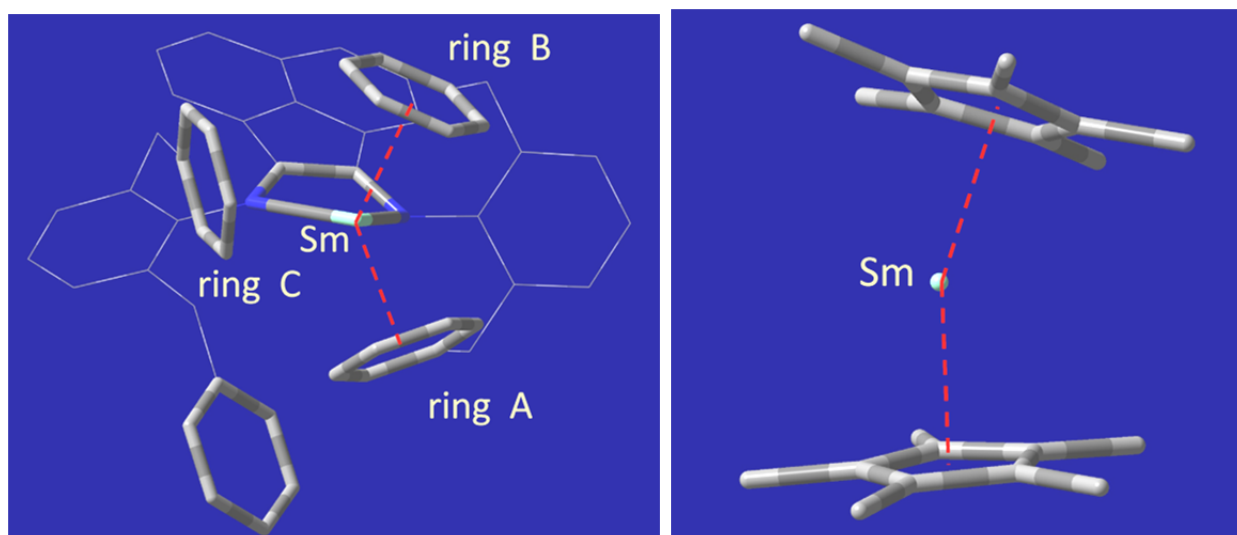

**Figure 7S.** The optimized geometries of complex **2c** (left) and  $(\text{Cp}^*)_2\text{Sm}$  (right). Hydrogen atoms are omitted.

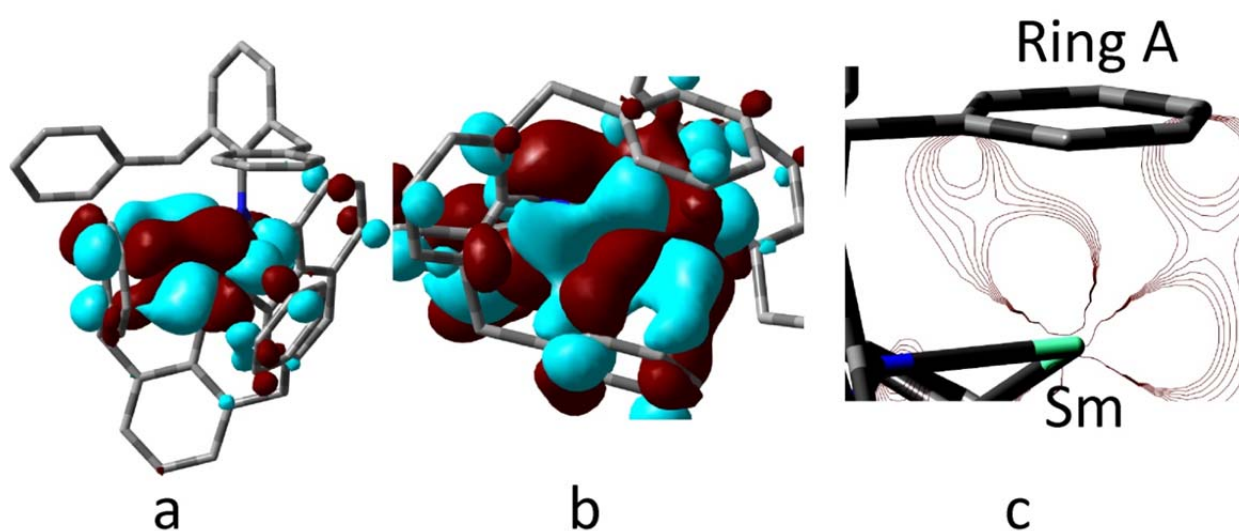

**Figure 8S.** HOMO (a) and HOMO-1 (b) isosurfaces (isovalue  $\pm 0.01$ ) in complex **2c** and the contour map of the HOMO positive part (0.01-0.02, step 0.002) in the SmCC plane showing the Sm-(ring A) orbital overlap (c).
